# Supplementary material
Source: PubMed Central journal article supplement (PMC516485)

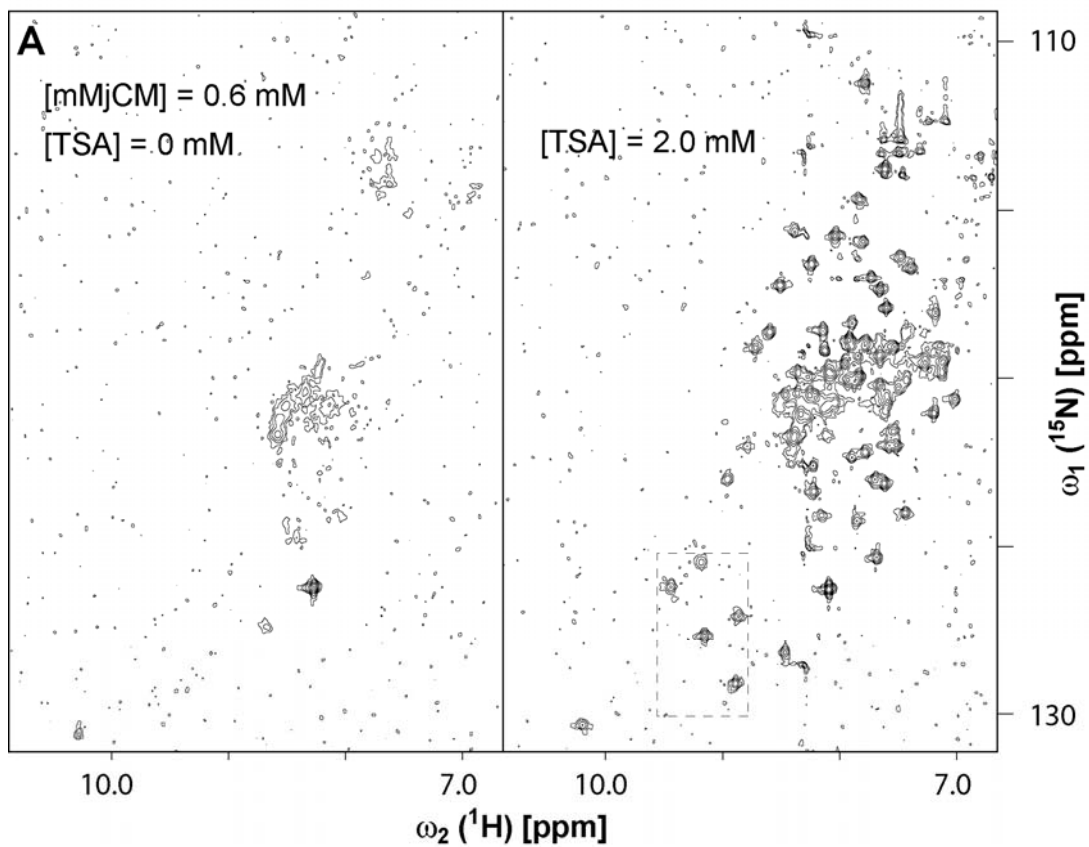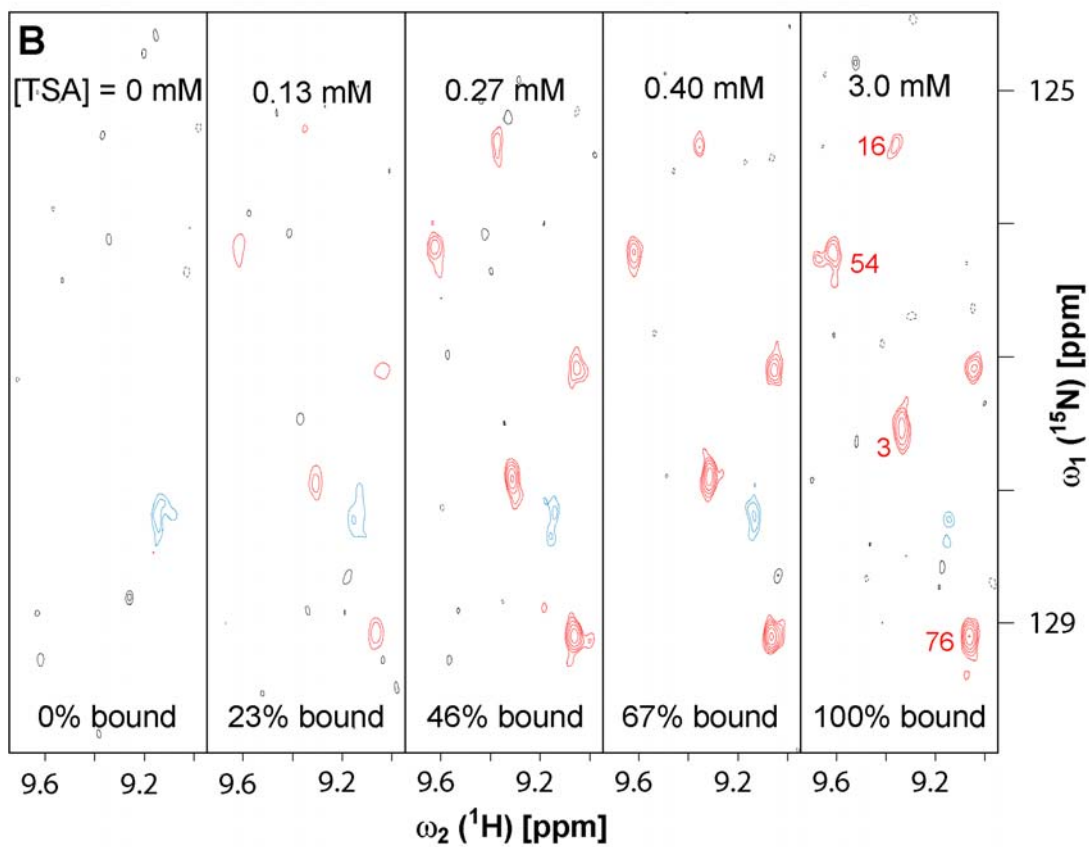

Supplement: pnas_101_35_12860__1.pdf [file pnas_101_35_12860__1.pdf]
